# Supplementary material for: Preparation of reactive surfaces by electrografting
Source: Royal Society of Chemistry journal article supplement (doi:10.1039/b307728d), 2003-01-01
Supplement: b307728d.pdf [file b307728d.pdf]

## Preparation of reactive surfaces by electrografting.

C. Jérôme<sup>a\*</sup>, S. Gabriel<sup>a</sup>, S. Voccia<sup>a</sup>, C. Detrembleur<sup>a</sup>, M. Ignatova<sup>a</sup>, R. Gouttebaron<sup>b</sup>, R. Jérôme<sup>a</sup>

### Electronic supplementary information

**Figure 1:** Coating of the conducting substrates by PNSA

a) XPS spectra of the electrografted PNSA: (A) nitrogen (B) oxygen (C) carbon

b) AFM micrograph (tapping mode) of Cu electrode modified by PNSA.

Table: Quantification of the reconstructed XPS spectrum for the carbon area (spectrum C)

**Figure 2:** Electroactivity of PNSA-FcNH<sub>2</sub>, in ACN containing TEAP (0.05M) film grafted on a Pt-QCM electrode (A) Cyclic voltammogram at 100 mV/s; (B) simultaneous change in frequency; (C) change in frequency for neat Pt

**Figure 3 :** Binding of biotin onto PNSA

a) PNSA grafted on ITO-glass after spraying with DMACA; (I) non-grafted area (II) modified area with PNSA-biotin

b) UV-Vis spectrum of (A) ITO-glass modified with PNSA-biotin; (B) after spraying with DMACA

**Figure 4 :** Binding of the glucose-oxidase (Gox) onto PNSA:

a) PNSA grafted on ITO-glass after Bradford test: (I) PNSA-Gox grafted area (II) non-grafted area

b)  $\Delta I$  measured at  $E=0.6V$  from voltammograms recorded at 5mV/s for C-PNSA-Gox dipped in a ferrocene carboxylic acid containing ( $10^{-3}M$ ) phosphate buffer upon addition of glucose.

**Figure 5.** Infrared reflection-absorption spectrum of poly(ethyleneimine) grafted onto the poly(N-succinimidyl acrylate) modified Inox 316L with the characteristic bands at  $3234\text{ cm}^{-1}$  for NH-stretching,  $1651\text{ cm}^{-1}$  for amide I; and  $1547\text{ cm}^{-1}$  for amide II proving the grafting efficiency.

a)

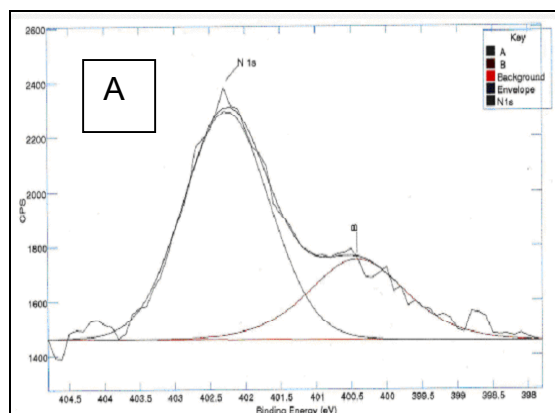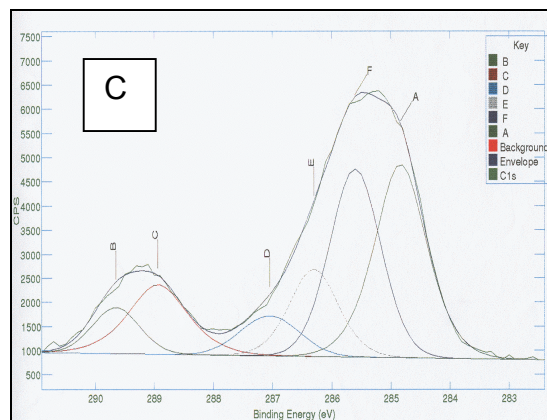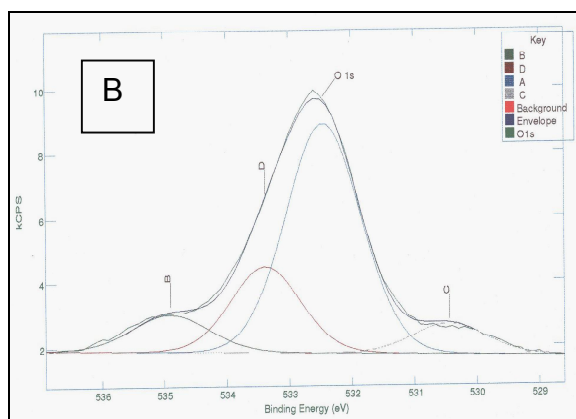

| Binding energy          | Expected number of atoms | Experimental number of atoms | Atomic % |
|-------------------------|--------------------------|------------------------------|----------|
| 285eV: <sup>1</sup> C   | 1                        | 5.1                          | 20.3     |
| 285.6eV: <sup>2</sup> C | 1                        | 4.7                          | 18.7     |
| 286.3eV: <sup>3</sup> C | 2                        | 2.1                          | 8.4      |
| 288.7eV: <sup>4</sup> C | 2                        | 2                            | 8        |
| 289.6eV: <sup>5</sup> C | 1                        | 1                            | 4        |
| 287eV: ?                | -                        | 1.1                          | 4.4      |

b)

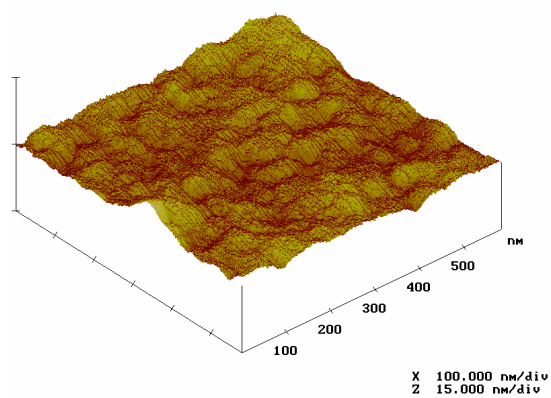

Figure 1

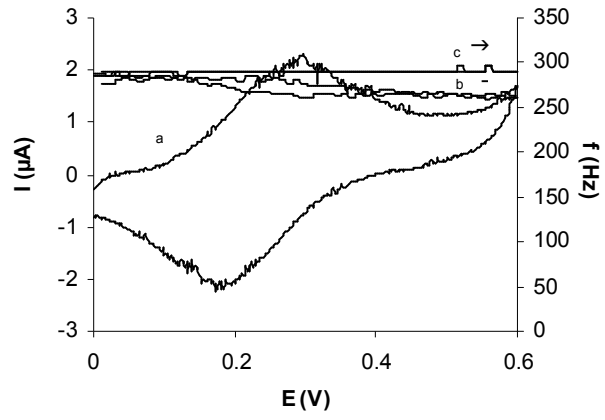

Figure 2

a)

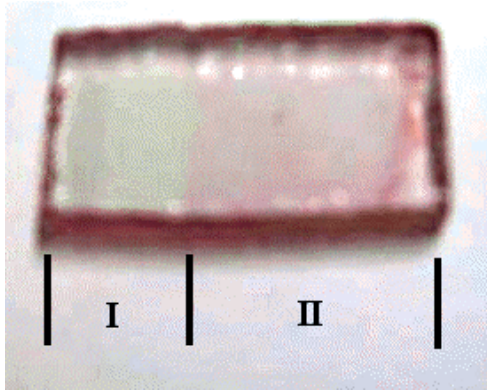

b)

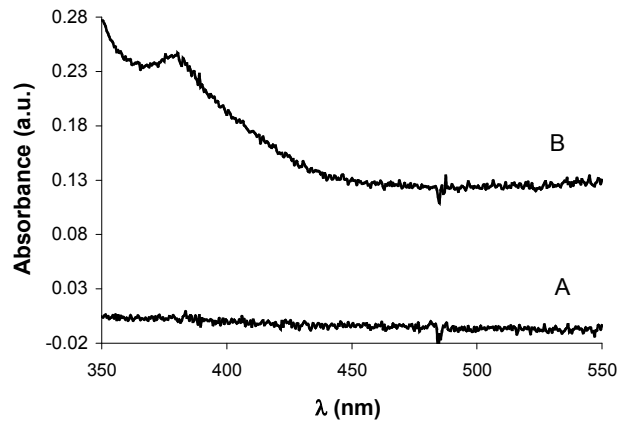

Figure 3

a)

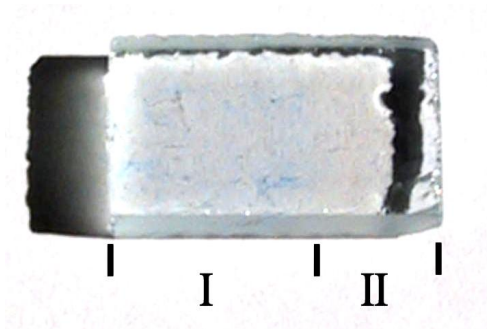

b)

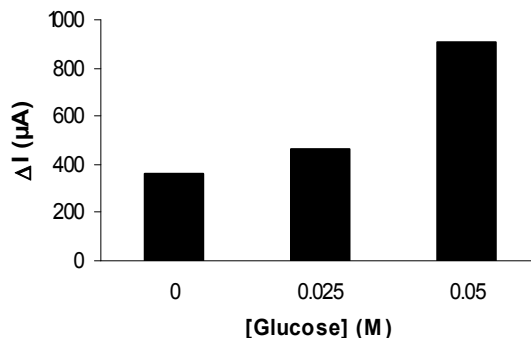

Figure 4

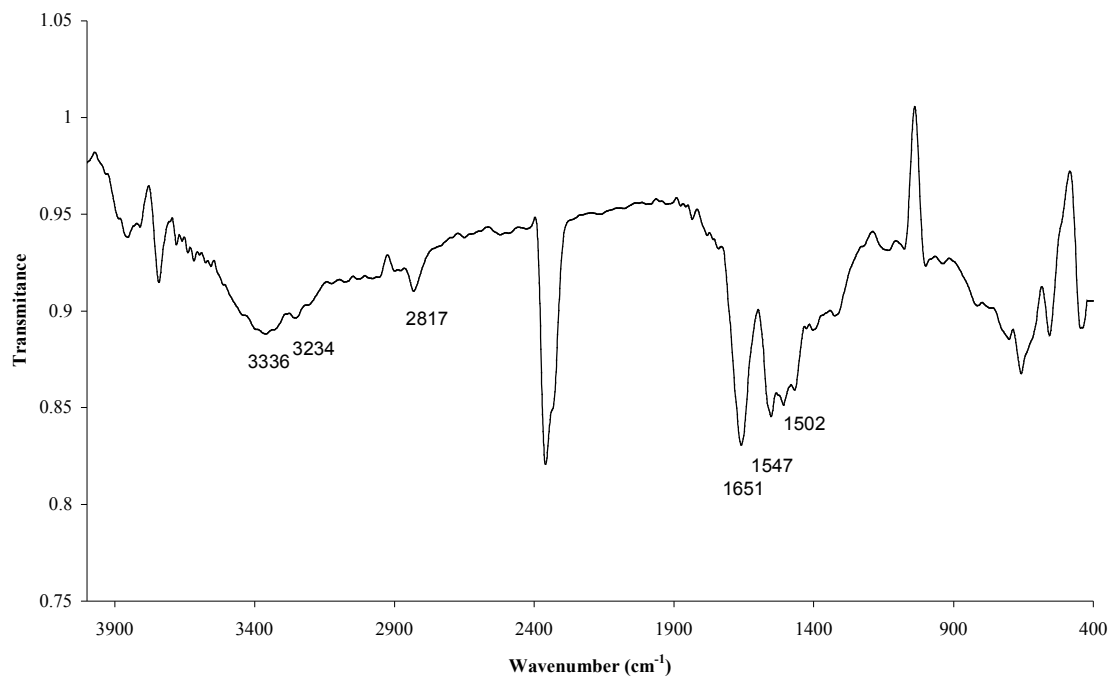

**Figure 5**
